# Supplementary material for: Slow relaxation of magnetization in unprecedented Cu–Ln-Rad hetero-tri-spin chains constructed from multidentate nitronyl nitroxide
Source: Royal Society of Chemistry journal article supplement (doi:10.1039/c9tc02410g), 2019-01-01
Supplement: c9tc02410g1.pdf [file c9tc02410g1.pdf]

## **Supporting Information**

# **Slow relaxation of magnetization in unprecedented Cu-Ln-Rad hetero-tri-spin chains constructed from multidentate nitronyl nitroxide**

Juan Sun, Zan Sun, Kang Wang, Lu Xi, Yue Ma, Licun Li\*

Department of Chemistry, Key Laboratory of Advanced Energy Materials Chemistry,  
College of Chemistry, Nankai University, Tianjin 300071, China

**Table S1.** Selected bond lengths [ $\text{\AA}$ ] and angles [ $^\circ$ ] for **1**.

| <i>Bond distances</i> |           |                      |           |
|-----------------------|-----------|----------------------|-----------|
| Gd(1)-O(2)            | 2.354(8)  | Gd(1)-O(9)           | 2.326(9)  |
| Gd(1)-O(6)            | 2.378(8)  | Gd(1)-O(5)           | 2.334(9)  |
| Gd(1)-O(11)           | 2.429(9)  | Gd(1)-O(10)          | 2.361(10) |
| Gd(1)-O(7)            | 2.391(9)  | Gd(1)-O(8)           | 2.359(9)  |
| Cu(2)-O(15)           | 1.935(8)  | Cu(2)-O(13)          | 1.943(8)  |
| Cu(2)-O(14)           | 1.920(8)  | Cu(2)-O(12)          | 2.180(9)  |
| Cu(2)-N(3)            | 2.007(9)  | Cu(3)-O(16)#1        | 1.998(8)  |
| Cu(3)-O(16)           | 1.998(8)  | Cu(3)-O(17)#1        | 2.276(9)  |
| Cu(3)-O(17)           | 2.276(9)  | Cu(3)-N(4)#1         | 2.029(9)  |
| Cu(3)-N(4)            | 2.029(9)  | Cu(1)-O(4)#2         | 1.944(9)  |
| Cu(1)-O(4)            | 1.943(9)  | Cu(1)-O(3)#2         | 1.939(8)  |
| Cu(1)-O(3)            | 1.939(8)  | Cu(1)-O(1)           | 2.423(9)  |
| Cu(1)-O(1)#2          | 2.423(9)  | O(2)-N(2)            | 1.294(12) |
| O(1)-N(1)             | 1.258(12) |                      |           |
| <i>Angles</i>         |           |                      |           |
| O(2)-Gd(1)-O(6)       | 73.0(3)   | O(2)-Gd(1)-O(11)     | 74.4(3)   |
| O(2)-Gd(1)-O(10)      | 144.9(3)  | O(2)-Gd(1)-O(7)      | 73.1(3)   |
| O(2)-Gd(1)-O(8)       | 142.0(3)  | O(9)-Gd(1)-O(2)      | 99.6(3)   |
| O(9)-Gd(1)-O(6)       | 82.1(3)   | O(9)-Gd(1)-O(5)      | 145.5(3)  |
| O(9)-Gd(1)-O(11)      | 141.6(3)  | O(9)-Gd(1)-O(10)     | 73.2(3)   |
| O(9)-Gd(1)-O(7)       | 70.5(3)   | O(9)-Gd(1)-O(8)      | 83.9(3)   |
| O(6)-Gd(1)-O(11)      | 129.1(3)  | O(6)-Gd(1)-O(7)      | 131.4(3)  |
| O(5)-Gd(1)-O(2)       | 96.1(3)   | O(5)-Gd(1)-O(6)      | 73.4(3)   |
| O(5)-Gd(1)-O(11)      | 72.4(3)   | O(5)-Gd(1)-O(10)     | 76.2(3)   |
| O(5)-Gd(1)-O(7)       | 143.9(3)  | O(5)-Gd(1)-O(8)      | 102.0(3)  |
| O(10)-Gd(1)-O(6)      | 72.0(3)   | O(10)-Gd(1)-O(11)    | 132.1(3)  |
| O(10)-Gd(1)-O(7)      | 131.5(3)  | O(7)-Gd(1)-O(11)     | 71.5(3)   |
| O(8)-Gd(1)-O(6)       | 144.3(3)  | O(8)-Gd(1)-O(11)     | 79.6(3)   |
| O(8)-Gd(1)-O(10)      | 72.5(3)   | O(8)-Gd(1)-O(7)      | 72.6(3)   |
| O(15)-Cu(2)-O(13)     | 174.1(4)  | O(15)-Cu(2)-O(12)    | 97.0(4)   |
| O(15)-Cu(2)-N(3)      | 89.5(4)   | O(13)-Cu(2)-O(12)    | 88.7(4)   |
| O(13)-Cu(2)-N(3)      | 90.9(4)   | O(14)-Cu(2)-O(15)    | 90.1(4)   |
| O(14)-Cu(2)-O(13)     | 87.7(4)   | O(14)-Cu(2)-O(12)    | 95.0(4)   |
| O(14)-Cu(2)-N(3)      | 161.6(4)  | N(3)-Cu(2)-O(12)     | 103.2(4)  |
| O(16)#1-Cu(3)-O(16)   | 180.0     | O(16)#1-Cu(3)-O(17)  | 92.9(3)   |
| O(16)-Cu(3)-O(17)     | 87.1(3)   | O(16)-Cu(3)-O(17)#1  | 92.9(3)   |
| O(16)#1-Cu(3)-O(17)#1 | 87.1(3)   | O(16)#1-Cu(3)-N(4)#1 | 90.4(3)   |
| O(16)-Cu(3)-N(4)      | 90.4(3)   | O(16)#1-Cu(3)-N(4)   | 89.6(3)   |
| O(16)-Cu(3)-N(4)#1    | 89.6(3)   | O(17)#1-Cu(3)-O(17)  | 180.0     |
| N(4)-Cu(3)-O(17)#1    | 90.2(4)   | N(4)#1-Cu(3)-O(17)#1 | 89.8(4)   |
| N(4)#1-Cu(3)-O(17)    | 90.2(4)   | N(4)-Cu(3)-O(17)     | 89.8(4)   |
| N(4)#1-Cu(3)-N(4)     | 180.0(5)  | O(4)-Cu(1)-O(4)#2    | 180.0     |
| O(4)#2-Cu(1)-O(1)#2   | 80.8(3)   | O(4)-Cu(1)-O(1)#2    | 99.2(3)   |
| O(4)#2-Cu(1)-O(1)     | 99.2(3)   | O(4)-Cu(1)-O(1)      | 80.8(3)   |
| O(3)-Cu(1)-O(4)#2     | 87.4(4)   | O(3)-Cu(1)-O(4)      | 92.6(4)   |
| O(3)#2-Cu(1)-O(4)#2   | 92.6(4)   | O(3)#2-Cu(1)-O(4)    | 87.4(4)   |
| O(3)#2-Cu(1)-O(3)     | 180.0     | O(3)#2-Cu(1)-O(1)#2  | 87.3(4)   |
| O(3)-Cu(1)-O(1)       | 87.3(4)   | O(3)-Cu(1)-O(1)#2    | 92.7(4)   |
| O(3)#2-Cu(1)-O(1)     | 92.7(4)   | O(1)-Cu(1)-O(1)#2    | 180.0     |
| N(2)-O(2)-Gd(1)       | 138.8(7)  | N(1)-O(1)-Cu(1)      | 158.2(8)  |

#1 -x+1,-y+1,-z      #2 -x+1,-y,-z+1

**Table S2.** Selected bond lengths [ $\text{\AA}$ ] and angles [ $^\circ$ ] for **2**.

| Bond distances    |            |                       |           |
|-------------------|------------|-----------------------|-----------|
| Tb(1)-O(9)        | 2.324(5)   | Cu(3)-O(16)           | 1.989(5)  |
| Tb(1)-O(8)        | 2.326(6)   | Cu(3)-N(4)            | 2.028(6)  |
| Tb(1)-O(5)        | 2.333(5)   | Cu(3)-N(4)#1          | 2.028(6)  |
| Tb(1)-O(2)        | 2.338(4)   | Cu(3)-O(17)           | 2.285(5)  |
| Tb(1)-O(10)       | 2.353(5)   | Cu(3)-O(17)#1         | 2.285(5)  |
| Tb(1)-O(6)        | 2.365(5)   | Cu(1)-O(4)#2          | 1.937(5)  |
| Tb(1)-O(7)        | 2.377(5)   | Cu(1)-O(4)            | 1.937(5)  |
| Tb(1)-O(11)       | 2.402(5)   | Cu(1)-O(3)            | 1.939(5)  |
| Cu(2)-O(15)       | 1.930(5)   | Cu(1)-O(3)#2          | 1.939(5)  |
| Cu(2)-O(13)       | 1.936(5)   | Cu(1)-O(1)            | 2.397(5)  |
| Cu(2)-O(14)       | 1.945(5)   | Cu(1)-O(1)#2          | 2.397(5)  |
| Cu(2)-N(3)        | 2.011(5)   | O(2)-N(2)             | 1.303(7)  |
| Cu(2)-O(12)       | 2.180(6)   | O(1)-N(1)             | 1.274(8)  |
| Cu(3)-O(16)#1     | 1.989(5)   |                       |           |
| Angles            |            |                       |           |
| O(9)-Tb(1)-O(8)   | 82.8(2)    | O(13)-Cu(2)-O(12)     | 88.7(2)   |
| O(9)-Tb(1)-O(5)   | 145.88(19) | O(14)-Cu(2)-O(12)     | 95.2(3)   |
| O(8)-Tb(1)-O(5)   | 102.0(2)   | N(3)-Cu(2)-O(12)      | 102.9(2)  |
| O(9)-Tb(1)-O(2)   | 100.80(17) | O(16)#1-Cu(3)-O(16)   | 180.0(2)  |
| O(8)-Tb(1)-O(2)   | 141.9(2)   | O(16)#1-Cu(3)-N(4)    | 89.4(2)   |
| O(5)-Tb(1)-O(2)   | 95.76(17)  | O(16)-Cu(3)-N(4)      | 90.6(2)   |
| O(9)-Tb(1)-O(10)  | 73.49(18)  | O(16)#1-Cu(3)-N(4)#1  | 90.6(2)   |
| O(8)-Tb(1)-O(10)  | 72.6(2)    | O(16)-Cu(3)-N(4)#1    | 89.4(2)   |
| O(5)-Tb(1)-O(10)  | 75.87(19)  | N(4)-Cu(3)-N(4)#1     | 180       |
| O(2)-Tb(1)-O(10)  | 145.17(17) | O(16)#1-Cu(3)-O(17)   | 92.38(18) |
| O(9)-Tb(1)-O(6)   | 82.88(18)  | O(16)-Cu(3)-O(17)     | 87.62(18) |
| O(8)-Tb(1)-O(6)   | 144.36(19) | N(4)-Cu(3)-O(17)      | 89.6(2)   |
| O(5)-Tb(1)-O(6)   | 73.68(19)  | N(4)#1-Cu(3)-O(17)    | 90.4(2)   |
| O(2)-Tb(1)-O(6)   | 73.10(16)  | O(16)#1-Cu(3)-O(17)#1 | 87.62(18) |
| O(10)-Tb(1)-O(6)  | 72.10(18)  | O(16)-Cu(3)-O(17)#1   | 92.38(18) |
| O(9)-Tb(1)-O(7)   | 70.46(18)  | N(4)-Cu(3)-O(17)#1    | 90.4(2)   |
| O(8)-Tb(1)-O(7)   | 72.0(2)    | N(4)#1-Cu(3)-O(17)#1  | 89.6(2)   |
| O(5)-Tb(1)-O(7)   | 143.4(2)   | O(17)-Cu(3)-O(17)#1   | 180       |
| O(2)-Tb(1)-O(7)   | 73.59(18)  | O(4)#2-Cu(1)-O(4)     | 180       |
| O(10)-Tb(1)-O(7)  | 131.71(19) | O(4)#2-Cu(1)-O(3)     | 87.1(2)   |
| O(6)-Tb(1)-O(7)   | 131.88(19) | O(4)-Cu(1)-O(3)       | 92.9(2)   |
| O(9)-Tb(1)-O(11)  | 141.5(2)   | O(4)#2-Cu(1)-O(3)#2   | 92.9(2)   |
| O(8)-Tb(1)-O(11)  | 79.3(2)    | O(4)-Cu(1)-O(3)#2     | 87.1(2)   |
| O(5)-Tb(1)-O(11)  | 71.8(2)    | O(3)-Cu(1)-O(3)#2     | 180       |
| O(2)-Tb(1)-O(11)  | 74.60(17)  | O(4)#2-Cu(1)-O(1)     | 99.8(2)   |
| O(10)-Tb(1)-O(11) | 131.01(18) | O(4)-Cu(1)-O(1)       | 80.2(2)   |
| O(6)-Tb(1)-O(11)  | 129.18(19) | O(3)-Cu(1)-O(1)       | 87.3(2)   |
| O(7)-Tb(1)-O(11)  | 71.7(2)    | O(3)#2-Cu(1)-O(1)     | 92.7(2)   |
| O(15)-Cu(2)-O(13) | 173.5(2)   | O(4)#2-Cu(1)-O(1)#2   | 80.2(2)   |
| O(15)-Cu(2)-O(14) | 90.3(2)    | O(4)-Cu(1)-O(1)#2     | 99.8(2)   |
| O(13)-Cu(2)-O(14) | 87.6(2)    | O(3)-Cu(1)-O(1)#2     | 92.7(2)   |
| O(15)-Cu(2)-N(3)  | 89.1(2)    | O(3)#2-Cu(1)-O(1)#2   | 87.3(2)   |
| O(13)-Cu(2)-N(3)  | 90.9(2)    | O(1)-Cu(1)-O(1)#2     | 180       |
| O(14)-Cu(2)-N(3)  | 161.8(3)   | N(2)-O(2)-Tb(1)       | 138.9(4)  |
| O(15)-Cu(2)-O(12) | 97.5(2)    | N(1)-O(1)-Cu(1)       | 157.7(5)  |

#1 -x+1,-y+1,-z      #2 -x+1,-y,-z+1

**Table S3.** Selected bond lengths [ $\text{\AA}$ ] and angles [ $^\circ$ ] for **3**.

| <i>Bond distances</i> |          |                      |          |
|-----------------------|----------|----------------------|----------|
| Dy(1)-O(5)            | 2.319(6) | Dy(1)-O(9)           | 2.323(6) |
| Dy(1)-O(2)            | 2.331(5) | Dy(1)-O(8)           | 2.334(7) |
| Dy(1)-O(10)           | 2.357(6) | Dy(1)-O(6)           | 2.360(6) |
| Dy(1)-O(7)            | 2.371(6) | Dy(1)-O(11)          | 2.400(6) |
| Cu(2)-O(15)           | 1.926(6) | Cu(2)-O(14)          | 1.941(6) |
| Cu(2)-O(13)           | 1.947(6) | Cu(2)-N(3)           | 2.009(6) |
| Cu(2)-O(12)           | 2.185(7) | Cu(3)-O(16)#1        | 1.997(6) |
| Cu(3)-O(16)           | 1.997(6) | Cu(3)-N(4)#1         | 2.038(7) |
| Cu(3)-N(4)            | 2.038(7) | Cu(3)-O(17)#1        | 2.287(6) |
| Cu(3)-O(17)           | 2.287(6) | Cu(1)-O(4)           | 1.931(6) |
| Cu(1)-O(4)#2          | 1.931(6) | Cu(1)-O(3)#2         | 1.950(5) |
| Cu(1)-O(3)            | 1.950(5) | Cu(1)-O(1)#2         | 2.414(6) |
| Cu(1)-O(1)            | 2.414(6) | O(2)-N(2)            | 1.299(8) |
| O(1)-N(1)             | 1.262(9) |                      |          |
| <i>Angles</i>         |          |                      |          |
| O(5)-Dy(1)-O(9)       | 145.7(2) | O(5)-Dy(1)-O(2)      | 96.8(2)  |
| O(9)-Dy(1)-O(2)       | 99.5(2)  | O(5)-Dy(1)-O(8)      | 101.0(2) |
| O(9)-Dy(1)-O(8)       | 83.9(2)  | O(2)-Dy(1)-O(8)      | 142.4(2) |
| O(5)-Dy(1)-O(10)      | 75.5(2)  | O(9)-Dy(1)-O(10)     | 73.9(2)  |
| O(2)-Dy(1)-O(10)      | 145.1(2) | O(8)-Dy(1)-O(10)     | 72.0(2)  |
| O(5)-Dy(1)-O(6)       | 74.1(2)  | O(9)-Dy(1)-O(6)      | 82.1(2)  |
| O(2)-Dy(1)-O(6)       | 73.1(2)  | O(8)-Dy(1)-O(6)      | 143.8(2) |
| O(10)-Dy(1)-O(6)      | 72.1(2)  | O(5)-Dy(1)-O(7)      | 143.5(2) |
| O(9)-Dy(1)-O(7)       | 70.6(2)  | O(2)-Dy(1)-O(7)      | 73.5(2)  |
| O(8)-Dy(1)-O(7)       | 72.4(3)  | O(10)-Dy(1)-O(7)     | 131.6(2) |
| O(6)-Dy(1)-O(7)       | 132.0(2) | O(5)-Dy(1)-O(11)     | 71.5(2)  |
| O(9)-Dy(1)-O(11)      | 142.1(2) | O(2)-Dy(1)-O(11)     | 74.8(2)  |
| O(8)-Dy(1)-O(11)      | 79.8(2)  | O(10)-Dy(1)-O(11)    | 131.0(2) |
| O(6)-Dy(1)-O(11)      | 128.9(2) | O(7)-Dy(1)-O(11)     | 71.9(2)  |
| O(15)-Cu(2)-O(14)     | 90.1(3)  | O(15)-Cu(2)-O(13)    | 173.7(3) |
| O(14)-Cu(2)-O(13)     | 88.0(3)  | O(15)-Cu(2)-N(3)     | 89.3(2)  |
| O(14)-Cu(2)-N(3)      | 162.6(3) | O(13)-Cu(2)-N(3)     | 90.8(3)  |
| O(15)-Cu(2)-O(12)     | 97.5(3)  | O(14)-Cu(2)-O(12)    | 95.0(3)  |
| O(13)-Cu(2)-O(12)     | 88.6(3)  | N(3)-Cu(2)-O(12)     | 102.4(3) |
| O(16)#1-Cu(3)-O(16)   | 180.0    | O(16)#1-Cu(3)-N(4)#1 | 90.4(3)  |
| O(16)-Cu(3)-N(4)#1    | 89.6(3)  | O(16)#1-Cu(3)-N(4)   | 89.6(3)  |
| O(16)-Cu(3)-N(4)      | 90.4(3)  | N(4)#1-Cu(3)-N(4)    | 180.0    |
| O(16)#1-Cu(3)-O(17)#1 | 87.5(2)  | O(16)-Cu(3)-O(17)#1  | 92.5(2)  |
| N(4)#1-Cu(3)-O(17)#1  | 89.8(3)  | N(4)-Cu(3)-O(17)#1   | 90.2(3)  |
| O(16)#1-Cu(3)-O(17)   | 92.5(2)  | O(16)-Cu(3)-O(17)    | 87.5(2)  |
| N(4)#1-Cu(3)-O(17)    | 90.2(3)  | N(4)-Cu(3)-O(17)     | 89.8(3)  |
| O(17)#1-Cu(3)-O(17)   | 180.0    | O(4)-Cu(1)-O(4)#2    | 180.0    |
| O(4)-Cu(1)-O(3)#2     | 87.2(2)  | O(4)#2-Cu(1)-O(3)#2  | 92.8(2)  |
| O(4)-Cu(1)-O(3)       | 92.8(2)  | O(4)#2-Cu(1)-O(3)    | 87.2(2)  |
| O(3)#2-Cu(1)-O(3)     | 180.0    | O(4)-Cu(1)-O(1)#2    | 99.0(2)  |
| O(4)#2-Cu(1)-O(1)#2   | 81.0(2)  | O(3)#2-Cu(1)-O(1)#2  | 87.6(3)  |
| O(3)-Cu(1)-O(1)#2     | 92.4(3)  | O(4)-Cu(1)-O(1)      | 81.0(2)  |
| O(4)#2-Cu(1)-O(1)     | 99.0(2)  | O(3)#2-Cu(1)-O(1)    | 92.4(3)  |
| O(3)-Cu(1)-O(1)       | 87.6(3)  | O(1)#2-Cu(1)-O(1)    | 180.0    |
| N(2)-O(2)-Dy(1)       | 139.8(5) | N(1)-O(1)-Cu(1)      | 158.8(6) |

#1 -x+1,-y+1,-z      #2 -x+1,-y,-z+1

**Table S4.** Selected bond lengths [ $\text{\AA}$ ] and angles [ $^\circ$ ] for **4**.

| <i>Bond distances</i> |           |                       |           |
|-----------------------|-----------|-----------------------|-----------|
| Ho(1)-O(2)            | 2.319(7)  | Ho(1)-O(9)            | 2.318(8)  |
| Ho(1)-O(6)            | 2.349(8)  | Ho(1)-O(5)            | 2.314(8)  |
| Ho(1)-O(11)           | 2.397(8)  | Ho(1)-O(10)           | 2.342(9)  |
| Ho(1)-O(7)            | 2.358(8)  | Ho(1)-O(8)            | 2.316(9)  |
| Cu(2)-O(15)           | 1.919(8)  | Cu(2)-O(13)           | 1.944(8)  |
| Cu(2)-O(14)           | 1.935(8)  | Cu(2)-O(12)           | 2.183(9)  |
| Cu(2)-N(3)            | 2.005(9)  | Cu(3)-O(16)#1         | 1.994(8)  |
| Cu(3)-O(16)           | 1.994(8)  | Cu(3)-O(17)#1         | 2.282(8)  |
| Cu(3)-O(17)           | 2.282(8)  | Cu(3)-N(4)#1          | 2.027(9)  |
| Cu(3)-N(4)            | 2.027(9)  | Cu(1)-O(4)            | 1.932(8)  |
| Cu(1)-O(4)#2          | 1.932(8)  | Cu(1)-O(3)#2          | 1.941(7)  |
| Cu(1)-O(3)            | 1.941(7)  | Cu(1)-O(1)#2          | 2.420(8)  |
| Cu(1)-O(1)            | 2.420(8)  | O(2)-N(2)             | 1.304(11) |
| O(1)-N(1)             | 1.254(12) |                       |           |
| <i>Angles</i>         |           |                       |           |
| O(2)-Ho(1)-O(6)       | 73.2(3)   | O(2)-Ho(1)-O(11)      | 74.6(3)   |
| O(2)-Ho(1)-O(10)      | 145.2(3)  | O(2)-Ho(1)-O(7)       | 73.4(3)   |
| O(2)-Ho(1)-O(8)       | 142.4(3)  | O(9)-Ho(1)-O(2)       | 99.5(3)   |
| O(9)-Ho(1)-O(6)       | 82.2(3)   | O(9)-Ho(1)-O(11)      | 141.8(3)  |
| O(9)-Ho(1)-O(10)      | 74.2(3)   | O(9)-Ho(1)-O(7)       | 70.6(3)   |
| O(9)-Ho(1)-O(8)       | 84.1(3)   | O(6)-Ho(1)-O(11)      | 129.0(3)  |
| O(6)-Ho(1)-O(7)       | 132.1(3)  | O(5)-Ho(1)-O(2)       | 97.0(3)   |
| O(5)-Ho(1)-O(9)       | 146.3(3)  | O(5)-Ho(1)-O(6)       | 74.8(3)   |
| O(5)-Ho(1)-O(11)      | 71.2(3)   | O(5)-Ho(1)-O(10)      | 75.5(3)   |
| O(5)-Ho(1)-O(7)       | 142.8(3)  | O(5)-Ho(1)-O(8)       | 100.2(3)  |
| O(10)-Ho(1)-O(6)      | 72.1(3)   | O(10)-Ho(1)-O(11)     | 131.0(3)  |
| O(10)-Ho(1)-O(7)      | 131.8(3)  | O(7)-Ho(1)-O(11)      | 71.6(3)   |
| O(8)-Ho(1)-O(6)       | 143.8(3)  | O(8)-Ho(1)-O(11)      | 79.7(3)   |
| O(8)-Ho(1)-O(10)      | 71.9(3)   | O(8)-Ho(1)-O(7)       | 72.7(3)   |
| O(15)-Cu(2)-O(13)     | 173.9(4)  | O(15)-Cu(2)-O(14)     | 90.2(3)   |
| O(15)-Cu(2)-O(12)     | 97.5(3)   | O(15)-Cu(2)-N(3)      | 89.5(3)   |
| O(13)-Cu(2)-O(12)     | 88.5(4)   | O(13)-Cu(2)-N(3)      | 90.4(3)   |
| O(14)-Cu(2)-O(13)     | 88.0(3)   | O(14)-Cu(2)-O(12)     | 94.9(4)   |
| O(14)-Cu(2)-N(3)      | 162.4(4)  | N(3)-Cu(2)-O(12)      | 102.6(4)  |
| O(16)#1-Cu(3)-O(16)   | 180.0     | O(16)#1-Cu(3)-O(17)#1 | 87.5(3)   |
| O(16)-Cu(3)-O(17)     | 87.5(3)   | O(16)-Cu(3)-O(17)#1   | 92.5(3)   |
| O(16)#1-Cu(3)-O(17)   | 92.5(3)   | O(16)-Cu(3)-N(4)      | 90.5(4)   |
| O(16)#1-Cu(3)-N(4)#1  | 90.5(4)   | O(16)-Cu(3)-N(4)#1    | 89.5(4)   |
| O(16)#1-Cu(3)-N(4)    | 89.5(4)   | O(17)#1-Cu(3)-O(17)   | 180.0     |
| N(4)-Cu(3)-O(17)      | 90.1(3)   | N(4)-Cu(3)-O(17)#1    | 89.9(3)   |
| N(4)#1-Cu(3)-O(17)#1  | 90.1(3)   | N(4)#1-Cu(3)-O(17)    | 89.9(3)   |
| N(4)#1-Cu(3)-N(4)     | 180.0     | O(4)-Cu(1)-O(4)#2     | 180.0     |
| O(4)-Cu(1)-O(3)       | 92.9(3)   | O(4)-Cu(1)-O(3)#2     | 87.1(3)   |
| O(4)#2-Cu(1)-O(3)#2   | 92.9(3)   | O(4)#2-Cu(1)-O(3)     | 87.1(3)   |
| O(4)#2-Cu(1)-O(1)#2   | 80.7(3)   | O(4)-Cu(1)-O(1)#2     | 99.3(3)   |
| O(4)-Cu(1)-O(1)       | 80.7(3)   | O(4)#2-Cu(1)-O(1)     | 99.3(3)   |
| O(3)#2-Cu(1)-O(3)     | 180.0     | O(3)#2-Cu(1)-O(1)     | 92.5(4)   |
| O(3)-Cu(1)-O(1)#2     | 92.5(4)   | O(3)#2-Cu(1)-O(1)#2   | 87.5(4)   |
| O(3)-Cu(1)-O(1)       | 87.5(4)   | O(1)#2-Cu(1)-O(1)     | 180.0     |
| N(2)-O(2)-Ho(1)       | 139.0(6)  | N(1)-O(1)-Cu(1)       | 158.1(8)  |

#1 -x+1,-y+1,-z      #2 -x+1,-y,-z+1

**Table S5.** SHAPE analysis for the Ln coordination spheres for **1-4**.

| Compound    | SAPR-8 | TDD-8        | JBTPR-8 | BTPR-8 | JSD-8 |
|-------------|--------|--------------|---------|--------|-------|
| <b>1 Gd</b> | 2.293  | <b>0.400</b> | 2.770   | 2.154  | 2.556 |
| <b>2 Tb</b> | 2.187  | <b>0.446</b> | 2.768   | 2.181  | 2.606 |
| <b>3 Dy</b> | 2.347  | <b>0.398</b> | 2.822   | 2.223  | 2.560 |
| <b>4 Ho</b> | 2.394  | <b>0.402</b> | 2.883   | 2.292  | 2.545 |

**Table S6.** Distances (Å) and angles (°) for the hydrogen bonds in compounds **1-4**.

| D–H···A        | Compound    | d(D–H) | d(H···A) | d(D···A) | <(DHA) |
|----------------|-------------|--------|----------|----------|--------|
| O11–H11B···O17 | <b>1 Gd</b> | 0.852  | 2.258    | 2.751    | 117.03 |
| O11–H11B···O17 | <b>2 Tb</b> | 0.850  | 2.143    | 2.730    | 125.94 |
| O11–H11B···O17 | <b>3 Dy</b> | 0.852  | 2.184    | 2.761    | 124.90 |
| O11–H11B···O17 | <b>4 Ho</b> | 0.851  | 2.166    | 2.759    | 126.64 |

**Table S7.** Magnetic relaxation parameters for  $\beta$ -diketone Dy(III) complexes possessing triangular dodecahedron ( $D_{2d}$ ) coordination spheres.

| Compound                                                                                                                          | $U_{\text{eff}}/k_B$ (K) | $\tau_0$ (s)                 | $\alpha$       | $H_{\text{dc}}$ (Oe) | Ref.      |
|-----------------------------------------------------------------------------------------------------------------------------------|--------------------------|------------------------------|----------------|----------------------|-----------|
| Dy(BTFA) <sub>3</sub> (H <sub>2</sub> O) <sub>2</sub>                                                                             | 93.09                    | $1.10 \times 10^{-6}$        | 0.03-0.41      | 0                    | 21a       |
|                                                                                                                                   | 296.50                   | $6.27 \times 10^{-12}$       | below 0.18     | 1200                 |           |
| [Dy(Phen)(tfmb) <sub>3</sub> ]                                                                                                    | 63.56                    | $4.48 \times 10^{-6}$        | below 0.21     | 0                    | 21b       |
|                                                                                                                                   | 118.50                   | $1.5 \times 10^{-7}$         | -              | 1200                 |           |
| [Dy <sub>4</sub> (hfac) <sub>8</sub> (IMPhThio) <sub>2</sub> (OH) <sub>4</sub> ][Dy(hfac) <sub>3</sub> (NITPhThio) <sub>2</sub> ] | 32                       | $2.96 \times 10^{-9}$        | 0.50-0.15      | 5000                 | 21c       |
| [Dy <sup>III</sup> (hfac) <sub>3</sub> (tmphen)]                                                                                  | 35.09                    | $9.16 \times 10^{-9}$        | 0.20–0.41      | 3500                 | 21d       |
| [Dy(dbpy)(tcpb) <sub>3</sub> ] $\cdot$ 0.5(1,4-dioxane)                                                                           | 149.87(FR);              | $1.42 \times 10^{-15}$ (FR); | -              | 0                    | 21e       |
|                                                                                                                                   | 79.69(SR)                | $1.08 \times 10^{-9}$ (SR)   |                |                      |           |
|                                                                                                                                   | 178.56                   | $1.84 \times 10^{-12}$       | 0.26–0.36      | 1000                 |           |
| [Dy(thd) <sub>2</sub> (NO <sub>3</sub> )(TPPO) <sub>2</sub> ]                                                                     | 20.7                     | $1.59 \times 10^{-6}$        | 0.12–0.23      | 1000                 | 21f       |
| [Dy(9Accm) <sub>2</sub> (NO <sub>3</sub> )(dmf) <sub>2</sub> ]                                                                    | 23                       | $1.3 \times 10^{-6}$         | 0.3-0.4        | 1000                 | 21g       |
| [Dy(L)(tmpd)]                                                                                                                     | 96.63                    | $3.38 \times 10^{-6}$        | 0.262 – 0.356  | 0                    | 21h       |
| [Dy <sub>2</sub> Cu <sub>2</sub> (hfac) <sub>10</sub> (NIT-3py) <sub>2</sub> (H <sub>2</sub> O) <sub>2</sub> ]                    | 13.14                    | $1.77 \times 10^{-6}$        | -              | 2000                 | 21i       |
| [Ln(hfac) <sub>3</sub> (pz) <sub>2</sub> ]                                                                                        | 28.32                    | $4.70 \times 10^{-6}$        | 0.203–0.009    | 0                    | 21j       |
|                                                                                                                                   | 17.8 (FR,LT)             | $6.2 \times 10^{-8}$ (FR,LT) | 0.13-0.41 (FR) | 0                    |           |
| {[Ln(hfac) <sub>3</sub> ][Cu(hfac) <sub>2</sub> ] <sub>2</sub> (3,5-bPy-Ph-Nit)(H <sub>2</sub> O) <sub>n</sub> }                  | 47.6 (SR)                | $4.4 \times 10^{-8}$ (SR)    | 0.02-0.10 (SR) |                      | this work |
|                                                                                                                                   | 12.7(FR,HT)              | $2.4 \times 10^{-6}$ (FR,HT) | 0.13-0.47(FR)  |                      |           |
|                                                                                                                                   | 19.8(FR,LT)              | $2.0 \times 10^{-8}$ (FR,LT) | 0.03–0.21(SR)  | 1000                 |           |
|                                                                                                                                   | 41.9(SR)                 | $9.9 \times 10^{-8}$ (SR)    |                |                      |           |

BTFA = 3-benzoyl-1,1,1-trifluoroacetone; tfmb = 4,4,4-trifluoro-1-(4-methylphenyl)-1,3-butanedione; Phen = 1,10-phenanthroline; NITPhThio = (2-(benzo[d]thiophen-2-yl)-4,4,5,5-tetramethylimidazolin-1-oxyl-3-oxide; IMPhThio = 2-(benzo[d]thiophen-2-yl)-4,4,5,5-tetramethylimidazolin-1-oxyl; tmphen = 3,4,7,8-tetramethyl-1,10-phenanthroline; dbpy = 4,4'-dimethyl-2,2'-bipyridyl; tcpb = 1-(4-chlorophenyl)-4,4,4-trifluoro-1,3-butanedione; thd = 2,2,6,6-tetramethyl-3,5-heptanedione; Tppo = Triphenylphosphane oxide; 9Accm = 1,7-di-9-anthracene-1,6-heptadiene-3,5-dione; H<sub>2</sub>L = N,N0-bis(2-hydroxy-5-methyl-3-formylbenzyl)-N,N0-bis-(pyridin-2-ylmethyl)ethylenediamine; tmpd = 4,4,4-trifluoro-1-(4-methoxyphenyl)-1,3-butanedione; NIT-3py = 2-(3-pyridyl)-4,4,5,5 -tetramethylimidazoline-1-oxyl-3-oxide; pz = pyrazole.

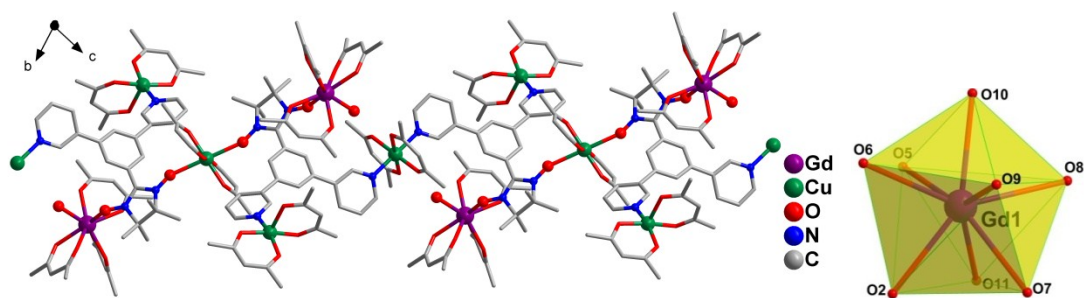

**Fig. S1** One-dimensional structure of **1** and local coordination geometry of Gd(III) ion (Fluorine and Hydrogen atoms are omitted for the sake of clarity).

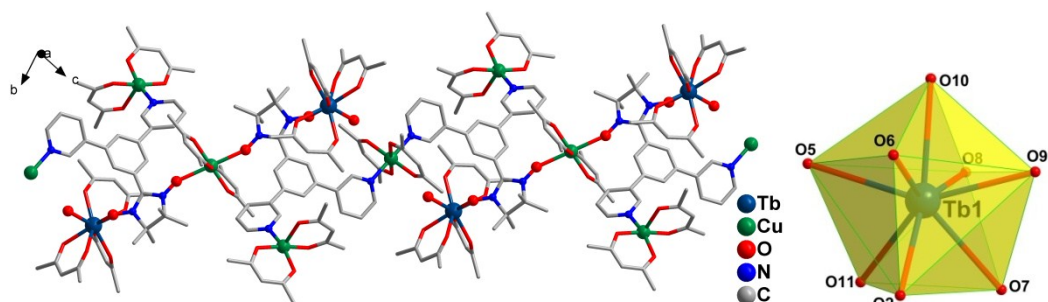

**Fig. S2** One-dimensional structure of **2** and local coordination geometry of Tb(III) ion (Fluorine and Hydrogen atoms are omitted for the sake of clarity).

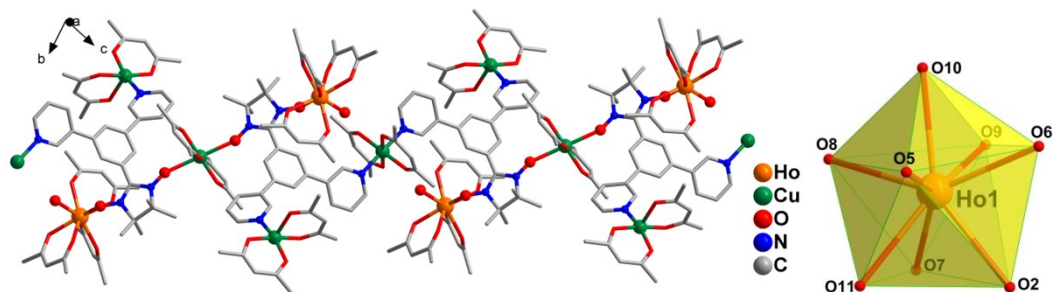

**Fig. S3** One-dimensional structure of **4** and local coordination geometry of Ho(III) ion (Fluorine and Hydrogen atoms are omitted for the sake of clarity).



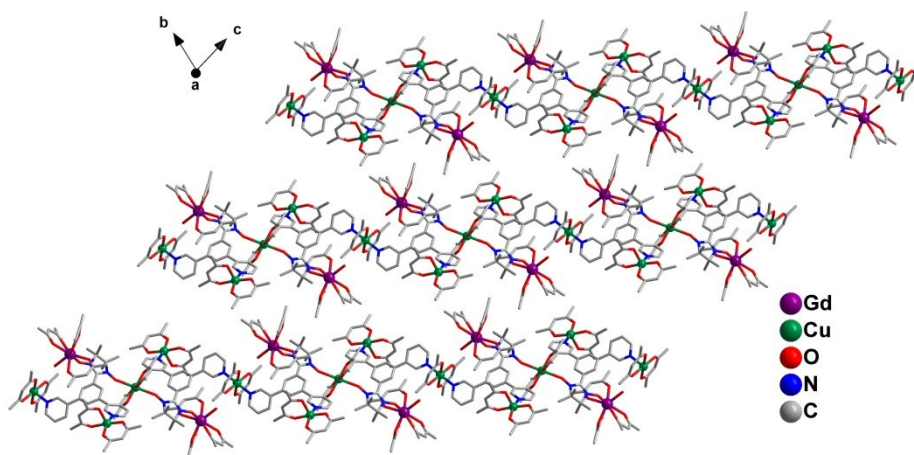

**Fig. S4** Packing arrangement of the chains in **1** (H and F atoms are omitted for clarity).

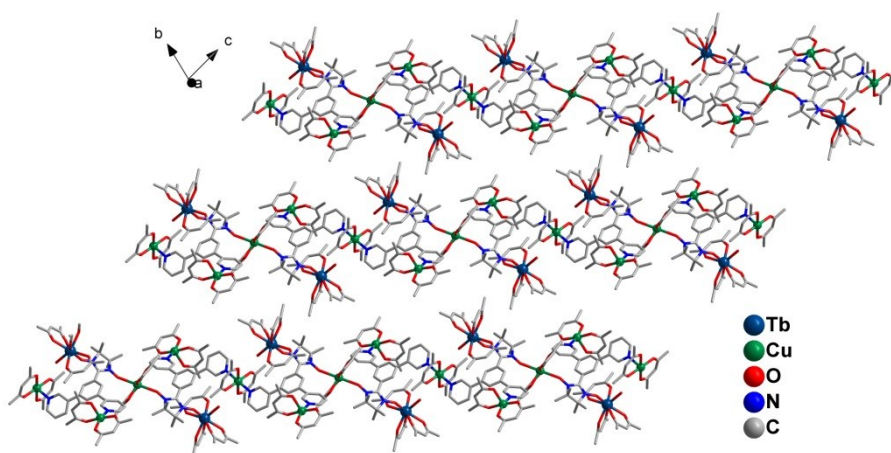

**Fig. S5** Packing arrangement of the chains in **2** (H and F atoms are omitted for clarity).

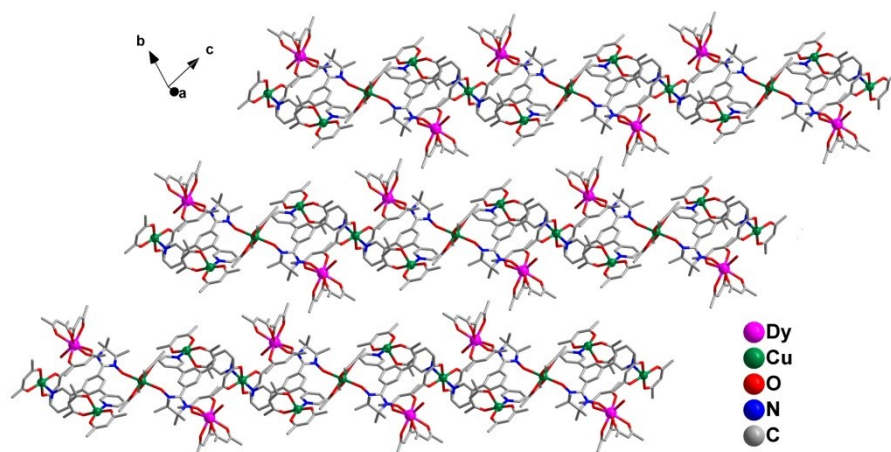

**Fig. S6** Packing arrangement of the chains in **3** (H and F atoms are omitted for clarity).

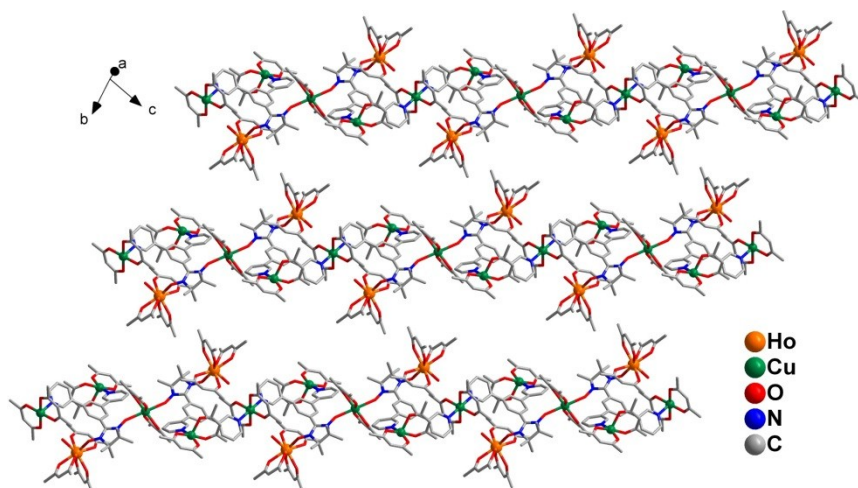

**Fig. S7** Packing arrangement of the chains in **4** (H and F atoms are omitted for clarity).

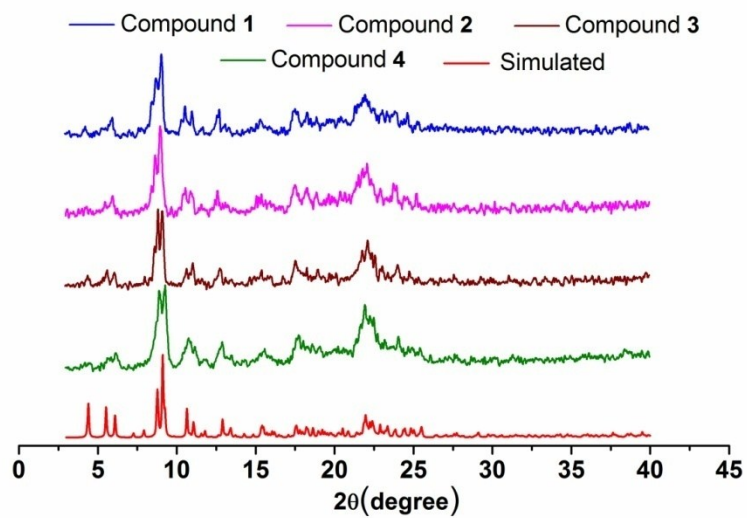

**Fig. S8** Powder X-ray diffraction patterns of complexes **1-4**.

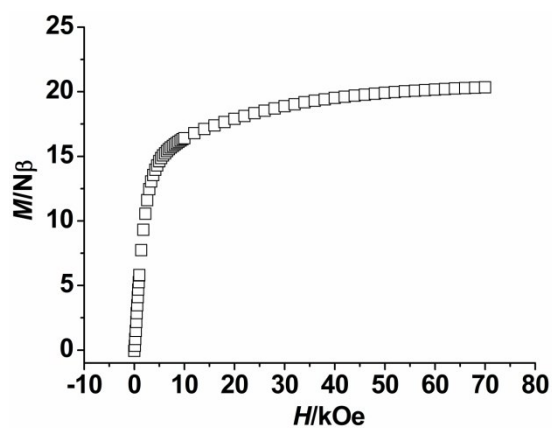

**Fig. S9** Plot of magnetization vs field for **2** at 2 K.

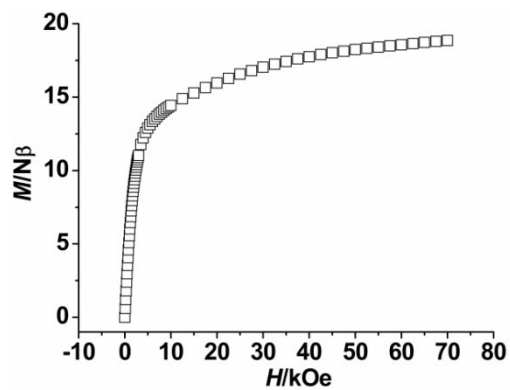

**Fig. S10** Plot of magnetization vs field for 3 at 2 K.

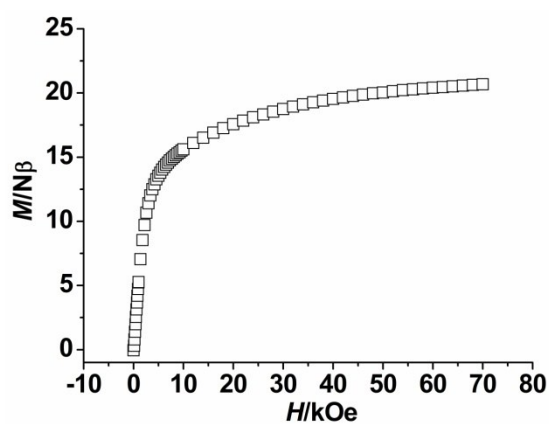

**Fig. S11** Plot of magnetization vs field for 4 at 2 K.

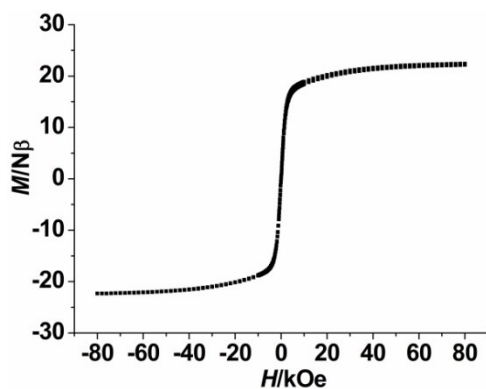

**Fig. S12**  $M$  vs  $H$  behavior for 3 at 2 K recorded from 80 kOe to -80 kOe.

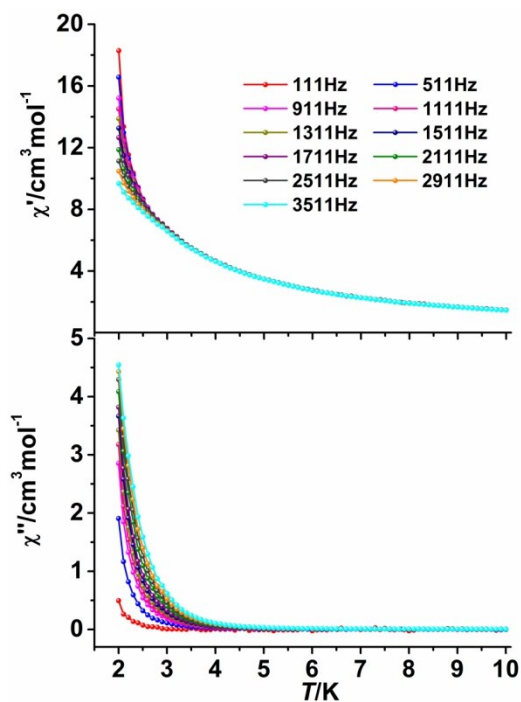

**Fig. S13** Temperature-dependent ac signals of the  $\chi'$  (top) and  $\chi''$  (bottom) under zero dc field for compound **2**.

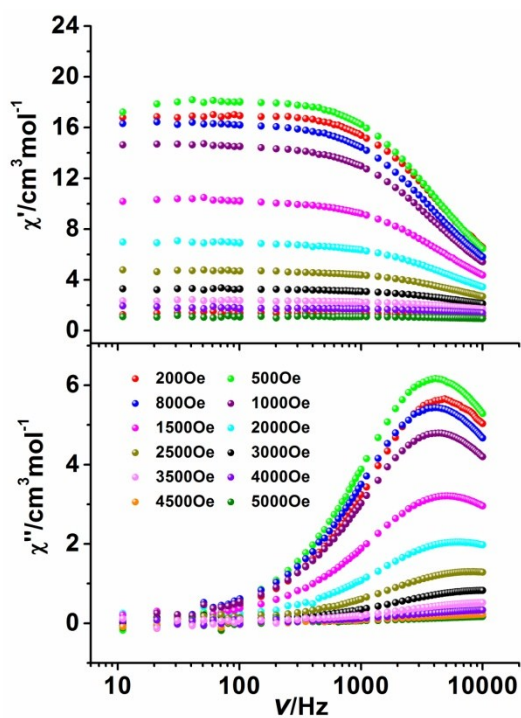

**Fig. S14** Frequency dependence of the  $\chi'$  (top) and  $\chi''$  (bottom) components of the ac susceptibility, between 0 and 5000 Oe and between 10 and 10000 Hz, for **2** at 2 K.

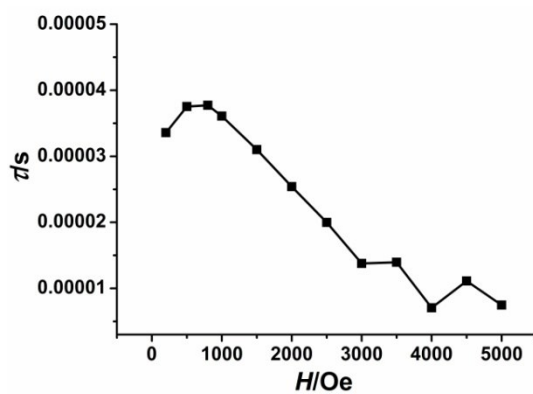

**Fig. S15** The  $\tau$  versus  $H$  plot for complex **2** at 2.0 K under the applied dc field.

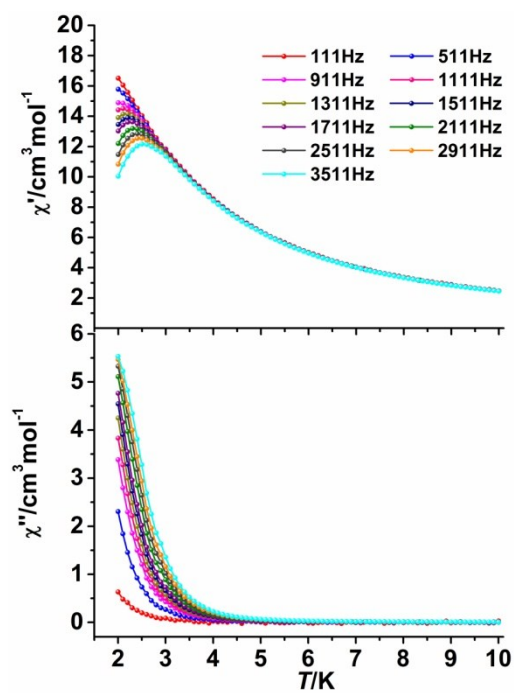

**Fig. S16** Temperature-dependent ac signals of the  $\chi'$  (top) and  $\chi''$  (bottom) under 800 Oe dc field for compound **2**.

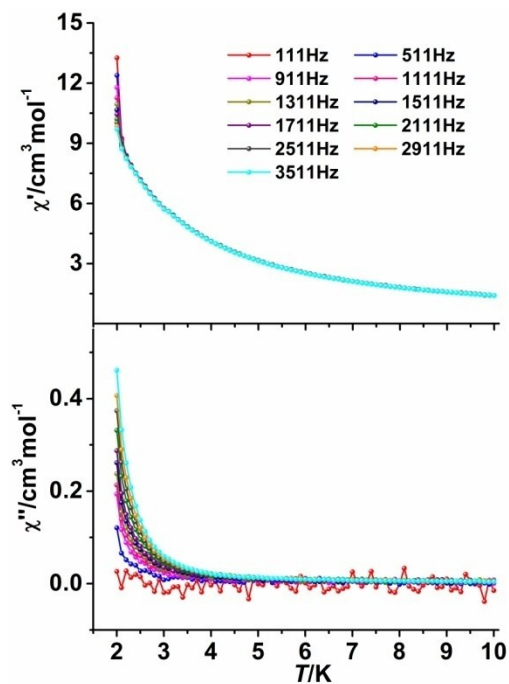

**Fig. S17** Temperature-dependent ac signals of the  $\chi'$  (top) and  $\chi''$  (bottom) under zero dc field for compound **4**.

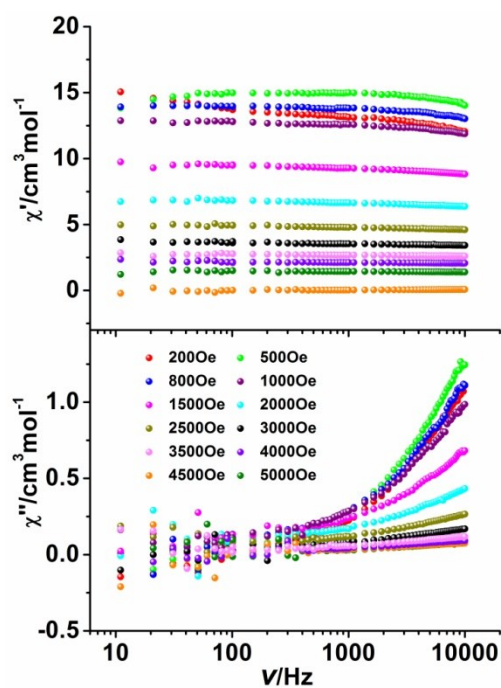

**Fig. S18** Frequency dependence of the  $\chi'$  (top) and  $\chi''$  (bottom) components of the ac susceptibility, between 0 and 5000 Oe and between 10 and 10000 Hz, for **4** at 2 K.

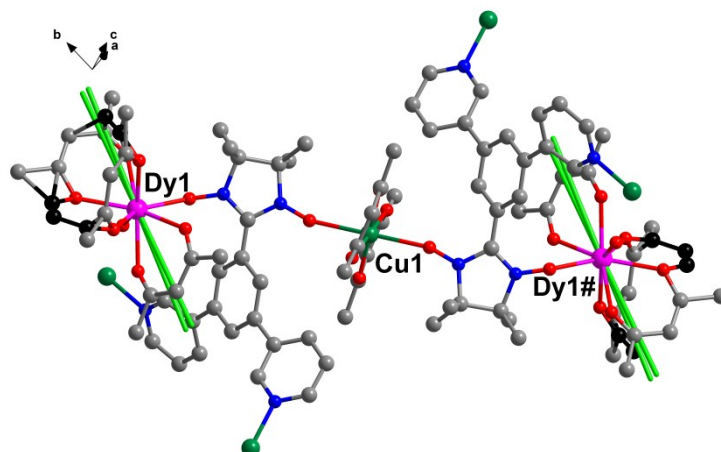

**Fig. S19** The Magellan predicted easy axes (bright green lines) of the Dy centers (black ball represent the disorder C atoms (occupancies: 50%)).

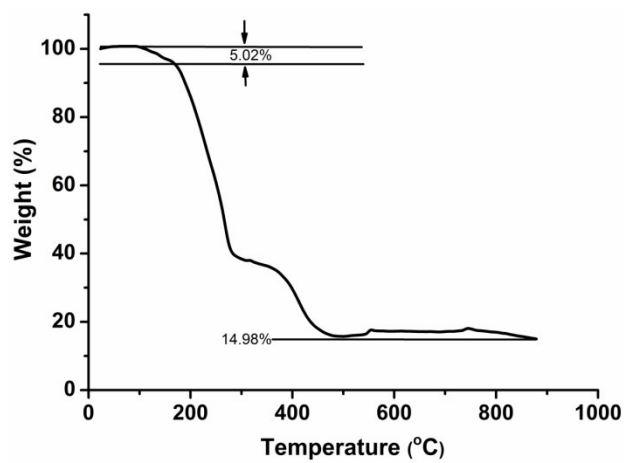

**Fig. S20** The TG curve of complex 1.
